# Supplementary material for: Treatment Beliefs in Patients with Mental Disorders in Psychosomatic Rehabilitation
Source: Atypon-hosted journal article supplement (doi:10.1027/2512-8442/a000087), 2021-08-02
Supplement: 2512-8442_a000087_esm1.pdf [file 2512-8442_a000087_esm1.pdf]

Supplementary Table S1

Code Scheme with Definition and Coding Rules of the Interviews

| Themes                                                         | Definition and Coding Rules<br>Theme is coded, if...                                                                                                                                                                           | Example (English Version)                                                                                                                                                   | Example (German Version)                                                                                                                                                                         |
|----------------------------------------------------------------|--------------------------------------------------------------------------------------------------------------------------------------------------------------------------------------------------------------------------------|-----------------------------------------------------------------------------------------------------------------------------------------------------------------------------|--------------------------------------------------------------------------------------------------------------------------------------------------------------------------------------------------|
| <b>Reasons for rehabilitation</b>                              | <p>... Diagnoses or symptoms are being reported leading directly to the rehabilitation.</p> <p>Furthermore, sections were coded into this theme, when negative effects from the disorder on the life were being described.</p> | <p><i>Yes, so I'm going there because of my depression and all my fears, also I because of my diabetes, and that should be newly dosed, so that it's checked again.</i></p> | <p><i>Ja, also ich fahre ja da hin wegen Depressionen und Angstzuständen und auch hin wegen meinem Zucker, dass der noch mal neu eingestellt wird, also überprüft wird dann.</i></p>             |
| <b>Conditions within the clinic</b>                            |                                                                                                                                                                                                                                |                                                                                                                                                                             |                                                                                                                                                                                                  |
| <ul style="list-style-type: none"> <li><b>Rules</b></li> </ul> | <p>...expectations towards the clinic rules were expressed. Clinic rules include regulations for visitors, private calls etc.</p>                                                                                              | <p><i>When you couldn't receive visitors. So, that would be, I mean I couldn't...No, that...I think that's what you need. Not necessarily every</i></p>                     | <p><i>Wenn man keinen Besuch empfangen könnte. Also, das wäre, also das könnte ich mir so ... Nein, das ... Also das bräuchte man glaub ich schon. Zwar jetzt nicht unbedingt jeden Tag,</i></p> |

|                                                                  |                                                                                                                                                                                                                                          |                                                                                                                                                                                                                                           |                                                                                                                                                                                                                                                                                                                                         |
|------------------------------------------------------------------|------------------------------------------------------------------------------------------------------------------------------------------------------------------------------------------------------------------------------------------|-------------------------------------------------------------------------------------------------------------------------------------------------------------------------------------------------------------------------------------------|-----------------------------------------------------------------------------------------------------------------------------------------------------------------------------------------------------------------------------------------------------------------------------------------------------------------------------------------|
|                                                                  |                                                                                                                                                                                                                                          | <i>day, but let's say at the weekend or something like that...</i>                                                                                                                                                                        | <i>aber sagen wir jetzt mal am Wochenende oder sonst noch dergleichen...</i>                                                                                                                                                                                                                                                            |
| <ul style="list-style-type: none"> <li>• <b>Staff</b></li> </ul> | <p>...expectations to the staff, including amount of staff members and qualification of staff. Theme has affective components, as sections were coded into this theme when the expectation to have trust in the staff was expressed.</p> | <p><i>...and the other thing that would be good for me, if I really have someone, a therapist, were I notice, I mean, where I don't need to be afraid or, for me or I don't need to have the feeling that I'm somehow ridiculous.</i></p> | <p><i>...und das andere, was mir saugut-tun würde ist, wenn ich da wirklich jemanden habe, einen Therapeuten oder Therapeutin, wo ich merke halt, also, da brauche ich jetzt keine Angst haben oder jetzt für mich selber oder ich habe das Gefühl, irgendwie lächerlich rüberzukommen oder halt das Gefühl lächerlich zu sein.</i></p> |
| <ul style="list-style-type: none"> <li>• <b>Food</b></li> </ul>  | <p>...expectations to the food in the clinic were reported.</p>                                                                                                                                                                          | <p><i>...that the food does not have one of these plastic covers, like classic hospital, that it's...someone told me it</i></p>                                                                                                           | <p><i>...das Essen nicht so mit dieser Plastikdecke drauf, also klassisch Krankenhaus, dass es halt...Irgendeiner</i></p>                                                                                                                                                                                                               |

|                                                                                   |                                                                                                      |                                                                                                                                                                                                                                     |                                                                                                                                                                                                                   |
|-----------------------------------------------------------------------------------|------------------------------------------------------------------------------------------------------|-------------------------------------------------------------------------------------------------------------------------------------------------------------------------------------------------------------------------------------|-------------------------------------------------------------------------------------------------------------------------------------------------------------------------------------------------------------------|
|                                                                                   |                                                                                                      | <i>would be a buffet in that clinic, I don't know, no idea.</i>                                                                                                                                                                     | <i>erzählte mir, es wäre sogar eine Buffetform, weiß ich nicht, keine Ahnung.</i>                                                                                                                                 |
| <ul style="list-style-type: none"> <li>• <b>Room</b></li> </ul>                   | ...expectations to the room and accommodation in general were described.                             | <i>And also, I know from other, that have already been there, that they have, and that's what hope, single rooms.</i>                                                                                                               | <i>Und auch, was ich weiß von Leuten, die schon da waren, es gibt auch, ich hoffe, Einzelzimmer</i>                                                                                                               |
| <ul style="list-style-type: none"> <li>• <b>Surrounding</b></li> </ul>            | ...expectation on the surrounding of the clinic and the facilities within the clinic were expressed. | <i>But I really do imagine the clinic, let's say, to have a feel-good atmosphere. I mean it's my first rehabilitation, I have never done that before, that's really just what I imagine, that it doesn't feel like a hospital."</i> | <i>Aber ich stelle es mir doch ein bisschen, ich sage mal, Wohlfühlatmosphäre vor. Also ich habe das noch nie gemacht, das ist wirklich nur eine Vorstellung, ja, dass es halt keine Klinikatmosphäre da ist.</i> |
| <b>Therapy planning</b>                                                           |                                                                                                      |                                                                                                                                                                                                                                     |                                                                                                                                                                                                                   |
| <ul style="list-style-type: none"> <li>• <b>Individualized therapy</b></li> </ul> | ...expectation is articulated to be seen as individual within the therapy planning. Thus,            | <i>Yes, if I get the impression, that they show interest in the individual patient,</i>                                                                                                                                             | <i>Ja, wenn ich einfach den Eindruck habe, dass man individuell auch auf die Patienten, also in dem Fall dann</i>                                                                                                 |

|                                                                                    |                                                                                                                             |                                                                                                                                                                                                                                                             |                                                                                                                                                                                                                                         |
|------------------------------------------------------------------------------------|-----------------------------------------------------------------------------------------------------------------------------|-------------------------------------------------------------------------------------------------------------------------------------------------------------------------------------------------------------------------------------------------------------|-----------------------------------------------------------------------------------------------------------------------------------------------------------------------------------------------------------------------------------------|
|                                                                                    | <p>this theme has more affective component, as the feeling of individualized was important.</p>                             | <p><i>in this case me and that they, yes, adjust things for the individual and have no “on size fits all” policy.</i></p>                                                                                                                                   | <p><i>auf mich, eingehen würde und das halt eben, ja, speziell auf den einzelnen Menschen abstimmt und nicht alles über einen Kamm schert.</i></p>                                                                                      |
| <ul style="list-style-type: none"> <li><b>Participation in planning</b></li> </ul> | <p>...interviewees expected to participate within their own therapy planning regarding kind of treatments and schedule.</p> | <p><i>Ahh, that would be super important to me, yes, so that I can say: That is something for me and I am capable of doing it and it’s fun and that it actually helps me. I mean that I participate in the planning, that would be importantm, yes.</i></p> | <p><i>Ach, das wäre mir auch ganz wichtig, ja, damit ich auch wirklich sagen kann: Das ist was für mich und das liegt mir und das macht mir Spaß, und das hilft mir, also dass ich das mitbestimme, das wäre schon wichtig, ja.</i></p> |
| <p><b>Organization of the therapy</b></p>                                          |                                                                                                                             |                                                                                                                                                                                                                                                             |                                                                                                                                                                                                                                         |
| <ul style="list-style-type: none"> <li><b>Schedule</b></li> </ul>                  | <p>...any expectation towards the schedule of the therapy during the stay in the clinic was expressed.</p>                  | <p><i>I mean too much waiting and spare time is not good as well, but you know, appointment after appointment, so</i></p>                                                                                                                                   | <p><i>Ich meine, zu viel Wartezeit und Freiraum ist auch nicht so gut, aber es ist halt so, direkt Termin an Termin,</i></p>                                                                                                            |

|                                                                                |                                                                                                                    |                                                                                                                                                                      |                                                                                                                                                                                                                                                                                |
|--------------------------------------------------------------------------------|--------------------------------------------------------------------------------------------------------------------|----------------------------------------------------------------------------------------------------------------------------------------------------------------------|--------------------------------------------------------------------------------------------------------------------------------------------------------------------------------------------------------------------------------------------------------------------------------|
|                                                                                |                                                                                                                    | <i>that you have to rush, that wouldn't be something I like.</i>                                                                                                     | <i>dass man hetzen muss, das ist dann auch nicht so was für mich.</i>                                                                                                                                                                                                          |
| <ul style="list-style-type: none"> <li>• <b>After treatment</b></li> </ul>     | ...interviewees wanted the treatment after the rehabilitation to be organized by the clinic.                       | <i>And that for the time afterwards, that you maybe get connected to certain therapist etc....yes...maybe also that at the beginning the clinic is there for me.</i> | <i>Und halt auch halt für die Zeit danach, dass man halt vielleicht halt auch halt gewisse Therapeuten etc. hat von dort auch aus vermittelt bekommt oder ... Ja, so ... Dass vielleicht halt auch die Klinik halt so für die Anfangszeit auch so ein bisschen mit da ist.</i> |
| <b>Content of the therapy</b>                                                  |                                                                                                                    |                                                                                                                                                                      |                                                                                                                                                                                                                                                                                |
| <ul style="list-style-type: none"> <li>• <b>Relaxing treatments</b></li> </ul> | ...a certain amount of relaxing treatment was expected. Relaxing treatment could be massages or therapeutic baths. | <i>Right, I... therapeutic baths, this is very important, also for example massages with fango is very important.</i>                                                | <i>Genau, ich... Es ist Radonband, es ist auch sehr wichtig hier zum Beispiel Massage mit Fango ist auch sehr wichtig.</i>                                                                                                                                                     |

|                                                                                  |                                                                                                                                                                      |                                                                                                                                                                                                                                                                    |                                                                                                                                                                                                                                                                                                         |
|----------------------------------------------------------------------------------|----------------------------------------------------------------------------------------------------------------------------------------------------------------------|--------------------------------------------------------------------------------------------------------------------------------------------------------------------------------------------------------------------------------------------------------------------|---------------------------------------------------------------------------------------------------------------------------------------------------------------------------------------------------------------------------------------------------------------------------------------------------------|
| <ul style="list-style-type: none"> <li>• <b>Relaxing techniques</b></li> </ul>   | <p>...interviewees expected to learn relaxing techniques during their stay, such as PMR.</p>                                                                         | <p><i>What was always good for me was autogenic training. Maybe there is more they, which I than might like.</i></p>                                                                                                                                               | <p><i>Was mir jetzt da immer gutgetan hat, war das autogene Training. Vielleicht gibt es da noch irgendwas, was mir da mir auch zusagt.</i></p>                                                                                                                                                         |
| <ul style="list-style-type: none"> <li>• <b>Activating treatments</b></li> </ul> | <p>...a certain amount of activating treatments was expected, such as sport or art therapy.</p>                                                                      | <p><i>Gardening or painting or something like this. These hours are really good yes. And you need to stick with it. I mean really...that makes you...it makes you calm down, that you can relax and where you can distract yourself from all the thinking.</i></p> | <p><i>Gartenarbeit oder Malen oder so. Die Stunden jetzt, die sind sehr gut, ja. Und das muss man auch beibehalten. Also das wirklich... also das bringt...also das beruhigt dich echt mal, das tut dich dann herunterholen, da wo du dich total wirklich ablenken kannst, von allem Nachdenken</i></p> |
| <ul style="list-style-type: none"> <li>• <b>Treatment by drugs</b></li> </ul>    | <p>...interviewees had expectations towards a readjustment of their treatment by drugs, regarding doses or substance, or wanted to start a treatment with drugs.</p> | <p><i>I'm taking pills right now and thus, I'd like them to take a look at that and maybe I can profit from that even after rehabilitation.</i></p>                                                                                                                | <p><i>Ich nehme ja jetzt zurzeit Tabletten, halt dass man dementsprechend auch da ein bisschen drauf eingeht und das</i></p>                                                                                                                                                                            |

|                                                                                       |                                                                                                                                                                     |                                                                                                                                                                                                                                                                                     |                                                                                                                                                                                                                                                                                                                                                       |
|---------------------------------------------------------------------------------------|---------------------------------------------------------------------------------------------------------------------------------------------------------------------|-------------------------------------------------------------------------------------------------------------------------------------------------------------------------------------------------------------------------------------------------------------------------------------|-------------------------------------------------------------------------------------------------------------------------------------------------------------------------------------------------------------------------------------------------------------------------------------------------------------------------------------------------------|
|                                                                                       |                                                                                                                                                                     |                                                                                                                                                                                                                                                                                     | <i>halt vielleicht auch auf nach der Reha mitnimmt.</i>                                                                                                                                                                                                                                                                                               |
| <ul style="list-style-type: none"> <li>• <b>Individual / group therapy</b></li> </ul> | <p>...expectations towards the setting of the psychotherapy was expressed (individual / group therapy). Included are the content of the therapy and group size.</p> | <p><i>Exactly, in a big group it's always hard. There it's never about...it's all so superficial, everything so, so, so abstract, right. And then that's not...it's lost time. So I think it's just a waste of time. Yes, in small groups is all way more...more effective.</i></p> | <p><i>Genau, in sehr großer Gruppe ist immer schwierig. Da kommt es nie um das...es ist alles so dann oberflächlich, alles so, so, so abstrakt ja. Und das ist gar nicht das...das eine vergeudete Zeit dann. Also ich finde das einfach, es ist eine Zeitverschwendung. Ja, in kleinen Gruppen ist das sehr viel mehr...als sehr effektiver.</i></p> |
| <ul style="list-style-type: none"> <li>• <b>Psychoeducation</b></li> </ul>            | <p>...information about the disorder, its treatment and symptoms were expected. The information could be given in individual talks or in group psychoeducation.</p> | <p><i>That they give a clear answer, that they say: Ok, Mr. XY, this is connected to that. And that they don't let you hanging in the air, because no one can tell you anything.</i></p>                                                                                            | <p><i>Dass man klare Antworten bekommt, dass man sagt: Gut, o.k., Herr XY, das hängt damit zusammen! Und</i></p>                                                                                                                                                                                                                                      |

|                                                                                                |                                                                                                                   |                                                                                                                                                                                 |                                                                                                                                                                                                     |
|------------------------------------------------------------------------------------------------|-------------------------------------------------------------------------------------------------------------------|---------------------------------------------------------------------------------------------------------------------------------------------------------------------------------|-----------------------------------------------------------------------------------------------------------------------------------------------------------------------------------------------------|
|                                                                                                |                                                                                                                   |                                                                                                                                                                                 | <i>nicht irgendwie so in der Luft gehan-<br/>gen lassen wird. Weil keiner wirklich<br/>was sagen kann.</i>                                                                                          |
| <ul style="list-style-type: none"> <li>• <b>Holistic treatment</b></li> </ul>                  | ...a treatment that focuses on the body and soul at the same time.                                                | <i>...it's not just the soul. There is so much more in the game. It's also the back, it's joints und really everything else. I...I expect them to see me in a holistic way.</i> | <i>...es ist nicht nur die Psyche. Es ist alles im Spiel. Das ist auch Rücken, auch Gelenke und wirklich alles. Ich ... ich erwarte jetzt, dass da wirklich ich als ganzheitlich gesehen werde</i>  |
| <b>Results of treatment</b>                                                                    |                                                                                                                   |                                                                                                                                                                                 |                                                                                                                                                                                                     |
| <ul style="list-style-type: none"> <li>• <b>Reduction of psychological symptoms</b></li> </ul> | ...the expectation of a reduction of psychological symptoms was expressed. Concrete symptoms should be mentioned. | <i>And what I really hope to work on, maybe through behavioural therapy, to work on my catastrophizing thinking, and let's say, to get away from that.</i>                      | <i>Und da hoffe ich mir eigentlich ein bisschen darauf, dass ich da mal vielleicht durch eine Verhaltenstherapie irgend so was mal von diesem katastrophierenden Denken, sag ich mal, wegkomme.</i> |



|                                                                                           |                                                                                                                                                                                |                                                                                                                                                                                                    |                                                                                                                                                                                                                              |
|-------------------------------------------------------------------------------------------|--------------------------------------------------------------------------------------------------------------------------------------------------------------------------------|----------------------------------------------------------------------------------------------------------------------------------------------------------------------------------------------------|------------------------------------------------------------------------------------------------------------------------------------------------------------------------------------------------------------------------------|
| <ul style="list-style-type: none"> <li>• <b>Reduction of physical symptoms</b></li> </ul> | <p>...the expectation of a reduction of physical symptoms was expressed. Concrete symptoms should be mentioned. The expectation of regeneration is included in this theme.</p> | <p><i>Also lately I have a back pain, knees. So and...what I expect is, that through more activity and fitness and focused training, I get that in a normal status again.</i></p>                  | <p><i>Also in letzter Zeit hatte ich so oft Rückenschmerzen, Knie. So und das...ich erwarte, dass ich da durch mehr Bewegung und Fitness und gezieltes Training das wieder alles so in den Normalbereich kriege, ja.</i></p> |
| <ul style="list-style-type: none"> <li>• <b>Coping strategies</b></li> </ul>              | <p>...the interviewee would like to learn coping strategies, to deal better with the disorder on a daily basis.</p>                                                            | <p><i>I hope that now I get on the right way, and just see, as I said in first priority, how I can cope with all this...</i></p>                                                                   | <p><i>Also ich hoffe mal, dass ich da auf jeden Fall auf den richtigen Weg komme, um einfach zu gucken, wie gesagt in erster Linie, wie ich mit dem Ganzen umgehen kann...</i></p>                                           |
| <ul style="list-style-type: none"> <li>• <b>Social participation</b></li> </ul>           | <p>...it was expected to participate more/better in social life after the treatment.</p>                                                                                       | <p><i>What I expect is that I can laugh again and speak to friends over the phone and meet up, all the things neglected. That's what I expect, because I already have a guilty conscience.</i></p> | <p><i>Ich erwarte wieder, dass ich mehr lache und wieder mehr mit Freunden telefonieren und mich treffen kann, was ich wieder jetzt alles vernachlässigt habe. Das erwarte ich, weil da</i></p>                              |

|                                                                                     |                                                                                 |                                                                                                                                                                          |                                                                                                                                                                                                                                                          |
|-------------------------------------------------------------------------------------|---------------------------------------------------------------------------------|--------------------------------------------------------------------------------------------------------------------------------------------------------------------------|----------------------------------------------------------------------------------------------------------------------------------------------------------------------------------------------------------------------------------------------------------|
|                                                                                     |                                                                                 |                                                                                                                                                                          | <i>habe ich auch schon ein schlechtes Gewissen.</i>                                                                                                                                                                                                      |
| <ul style="list-style-type: none"> <li>• <b>Vocational participation</b></li> </ul> | ...it was expected to participate more/better in work life after the treatment. | <i>And what I really expect is to get fit back home and that with full energy I can get back into work with full power and continue with everything.</i>                 | <i>Und ich erwarte wirklich, dass ich fit zurückkomme und gleich einsteige wieder mit voller Kraft in meinem Beruf und weitermache.</i>                                                                                                                  |
| <ul style="list-style-type: none"> <li>• <b>Transfer into daily life</b></li> </ul> | ...the results were expected to radiate into daily life.                        | <i>Maybe I'm not the right patient for that, because I have my problems because I take care of my sick mother. And when I get back home, my mother is still there...</i> | <i>Ja, ich denke, da bin ich vielleicht wiederum nicht der richtige Proband, weil meine Probleme halt einfach durch die Pflege meiner Mutter kommen. Und wenn ich ja wieder nach Hause komme, ist meine Mutter ja voraussichtlich immer noch da, ...</i> |
| <ul style="list-style-type: none"> <li>• <b>Finding the old me</b></li> </ul>       | ...interviewees said that they want to be as they used to be after treatment.   | <i>And that I get into a state, where everything is as it used to be and everything will be fine again.</i>                                                              | <i>Und dass ich einfach in einen Zustand wieder komme, wie ich vorher war, und dass alles wieder gut läuft.</i>                                                                                                                                          |

|                                                                            |                                                                            |                                                                                                                                                                                                                                                                                                                                                                                  |                                                                                                                                                                                                                                                                                                                                                                                                                                                                              |
|----------------------------------------------------------------------------|----------------------------------------------------------------------------|----------------------------------------------------------------------------------------------------------------------------------------------------------------------------------------------------------------------------------------------------------------------------------------------------------------------------------------------------------------------------------|------------------------------------------------------------------------------------------------------------------------------------------------------------------------------------------------------------------------------------------------------------------------------------------------------------------------------------------------------------------------------------------------------------------------------------------------------------------------------|
| <ul style="list-style-type: none"> <li>• <b>Quality of life</b></li> </ul> | <p>...the aim was to have better quality of life after rehabilitation.</p> | <p><i>To put it into one sentence, I want to find a better quality of life or with certain thing...I mean...how to say this?</i></p> <p><i>To learn how to cope with certain things. That would be important to me. And to find a bit more quality of life, so to get more quality of life. That's what's most important to me. That's what everything else is built on.</i></p> | <p><i>Also, um es halt mit einem Satz auszudrücken, möchte ich einfach dadurch ein bisschen mehr Lebensqualität wiederhaben bzw. halt mit gewissen Dingen besser, also ... damit also ... Wie soll ich denn das sagen? Halt damit zu lernen, besser umzugehen. Das wäre halt mir persönlich wichtig. Und halt wieder ein Stück Lebensqualität, also mehr Lebensqualität zu haben. Das ist mir halt am wichtigsten. Weil da drauf baut sich für mich alles drauf auf.</i></p> |
| <p><b>Concerns</b></p>                                                     |                                                                            |                                                                                                                                                                                                                                                                                                                                                                                  |                                                                                                                                                                                                                                                                                                                                                                                                                                                                              |

|                                                                                         |                                                                                                                                                                 |                                                                                                                                                                                                                                                                                                                                                                     |                                                                                                                                                                                                                                                                                                                                                                                                                                                                                |
|-----------------------------------------------------------------------------------------|-----------------------------------------------------------------------------------------------------------------------------------------------------------------|---------------------------------------------------------------------------------------------------------------------------------------------------------------------------------------------------------------------------------------------------------------------------------------------------------------------------------------------------------------------|--------------------------------------------------------------------------------------------------------------------------------------------------------------------------------------------------------------------------------------------------------------------------------------------------------------------------------------------------------------------------------------------------------------------------------------------------------------------------------|
| <ul style="list-style-type: none"> <li>• <b>Misjudgment of therapist</b></li> </ul>     | <p>...the concern was expressed, that therapist could misjudge the health status and negative consequences follow for the therapy itself of the daily life.</p> | <p><i>My concern is, and what I experienced in 2012 is, what I said before, that they told me „Mr. XX, you’re healthy and when you’ll leave us this Saturday you can go back to work on Monday.” And everything in me said “No, I don’t want to go there” And it was like...and that, yes, would be the worst concern for me, that this would happen again.</i></p> | <p><i>Also, die Befürchtung, die ich leider halt auch da 2012 teilen musste, und das hatte ich eben gerade kurz angesprochen, dass man mir gesagt hat, also, Herr XX, Sie sind gesund. Und wenn Sie jetzt hier am Samstag rausgehen, gehen Sie am Montag wieder auf die Arbeit und in mir hat alles geschrien und: Nein, ich will da nicht hin! Also, es war dann ... Und das, ja, also das wäre die schlimmste Befürchtung für mich, dass das wieder passieren würde.</i></p> |
| <ul style="list-style-type: none"> <li>• <b>Negative reactions by others</b></li> </ul> | <p>...the concern to experience negative reaction by others due to the stay in the clinic or</p>                                                                | <p><i>Yes, actually I didn’t want to go, because I really panic thinking of my</i></p>                                                                                                                                                                                                                                                                              | <p><i>Ich, ja, wollte das eigentlich auch gar nicht, weil ich, ja, viel zu sehr Panik vor der Reaktion meiner Kollegen</i></p>                                                                                                                                                                                                                                                                                                                                                 |

|                                            |                                                                                                                              |                                                                                                                                                                                                                                                                                                                     |                                                                                                                                                                                                                                                                                                                 |
|--------------------------------------------|------------------------------------------------------------------------------------------------------------------------------|---------------------------------------------------------------------------------------------------------------------------------------------------------------------------------------------------------------------------------------------------------------------------------------------------------------------|-----------------------------------------------------------------------------------------------------------------------------------------------------------------------------------------------------------------------------------------------------------------------------------------------------------------|
|                                            | that being absence from home would have negative consequences.                                                               | <i>work colleagues reaction and my workplace in general.</i>                                                                                                                                                                                                                                                        | <i>und überhaupt irgendwie meiner Arbeitsstelle hatte.</i>                                                                                                                                                                                                                                                      |
| • <b>Homesickness</b>                      | ...interviewees feared to get homesick during their stay.                                                                    | <i>Concerns are that I'll get homesick.</i>                                                                                                                                                                                                                                                                         | <i>Befürchtungen sind die, dass ich Heimweh haben werde.</i>                                                                                                                                                                                                                                                    |
| • <b>Not able to manage rehabilitation</b> | ...the concern of not being able to manage the treatment was described. Reasons might be tight schedule or cognitive effort. | <i>Sometimes I have bit concerns, when there is a lot going on, that I can actually stand up to it.</i>                                                                                                                                                                                                             | <i>Manchmal auch so ein bisschen Bedenken habe, wenn da halt einiges kommt, ob ich dem überhaupt allem so gewachsen bin dann.</i>                                                                                                                                                                               |
| • <b>Data leak</b>                         | ...the concern was expressed, that data or private details would be leaked or given to health care insurances.               | <i>That it does have negative consequences for me. Let's say, when I say, I don't manage and I need some time for me [...]that after the rehabilitation the go: "No, Mr. XY, can't go back to work, he'll get sick pay", but the insurance is like "No, you didn't participate in the therapy for a day and you</i> | <i>Dass das dann halt danach halt auch nicht negativ ausgelegt wird, sage ich mal. Ich sage mal, es bringt ja nichts, wenn ich sage halt, ich schaffe es nicht oder ich brauche einfach Zeit für mich den Tag halt, [...] nach der Reha sagt man halt: Nein, der Herr X kann noch nicht arbeiten gehen, der</i> |

|                                         |                                                                               |                                                                                                                                                                                                                                                                                                                 |                                                                                                                                                                                                                                                                                                                                                                            |
|-----------------------------------------|-------------------------------------------------------------------------------|-----------------------------------------------------------------------------------------------------------------------------------------------------------------------------------------------------------------------------------------------------------------------------------------------------------------|----------------------------------------------------------------------------------------------------------------------------------------------------------------------------------------------------------------------------------------------------------------------------------------------------------------------------------------------------------------------------|
|                                         |                                                                               | <i>need to life with that now without sick pay.”</i>                                                                                                                                                                                                                                                            | <i>kriegt dann bald Krankengeld und die Krankenkasse sagt dann halt: Nein, hier, du hast den Tag nicht Therapie mit jemand, hast du halt Pech.</i>                                                                                                                                                                                                                         |
| <b>Expectation towards own behavior</b> | ...interviewees expected to participate and be open minded during their stay. | <i>So, my opinion is that you should be open minded and approach everything openly, before you build an opinion. And I think there are some people, I don't know, who are skeptical from the beginning onward and, when you ask me, should even be in Rehabilitation than, if they don't want to accept it.</i> | <i>Also, ich bin der Meinung, man sollte auch erst mal offen auf alles zugehen, bevor man sich eine Meinung bildet. Und ich denke mal, es gibt ganz viele Leute, die von vorn herein, weiß ich nicht, der ganzen Sache skeptisch gegenüberstehen und dann meiner Meinung nach das nicht unbedingt in Anspruch nehmen sollten, wenn sie sowieso nichts annehmen wollen.</i> |

|                                                                                               |                                                                                                                                         |                                                                                                                                                         |                                                                                                                                                                                            |
|-----------------------------------------------------------------------------------------------|-----------------------------------------------------------------------------------------------------------------------------------------|---------------------------------------------------------------------------------------------------------------------------------------------------------|--------------------------------------------------------------------------------------------------------------------------------------------------------------------------------------------|
| <p><b>Contact to other patients</b></p>                                                       | <p>...interviewees expressed how they want to deal with other patients, including both positive and negative ideas.</p>                 | <p><i>And of course, in contact with other patients, maybe get the one or other idea for a solution for my problems, that's what I can imagine.</i></p> | <p><i>Aber natürlich auch im Austausch mit anderen Patienten die eine oder andere Lösung schon für ein Problem vielleicht, wie ich nicht, so in der Art stelle ich mir vor.</i></p>        |
| <p><b>Previous knowledge / Context</b></p>                                                    |                                                                                                                                         |                                                                                                                                                         |                                                                                                                                                                                            |
| <ul style="list-style-type: none"> <li>• <b>Prior information from the clinic</b></li> </ul>  | <p>...the interviewees already knew something about the treatment, because they got information from the clinic itself.</p>             | <p><i>Actually, not that much, I mean, what the clinic provided, but that was not that much. That's what I thought.</i></p>                             | <p><i>Puh, eigentlich relativ wenig, also das, was ich von der Klinik halt zur Verfügung gestellt bekommen habe, aber das war jetzt nicht so ausführlich. Das finde ich zumindest.</i></p> |
| <ul style="list-style-type: none"> <li>• <b>Earlier rehabilitation experiences</b></li> </ul> | <p>...the interviewee already had a rehabilitation treatment and therefore had knowledge about content and organization of therapy.</p> | <p><i>Yes, what I expect is that the organization and the schedule are somewhat like I know it from my previous rehabilitation treatment.</i></p>       | <p><i>Ja, ich vermute mal, dass der Tagesablauf ungefähr so sein wird, wie auch in den Reha-Maßnahmen vorher...</i></p>                                                                    |
